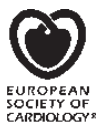

# The burden of cardiovascular risk factors and coronary heart disease in Europe and worldwide

Gemma Vilahur<sup>1</sup>, Juan José Badimon<sup>2</sup>, Raffaele Bugiardini<sup>3</sup>, and Lina Badimon<sup>1,4\*</sup>

<sup>1</sup>Cardiovascular Research Center, CSIC-ICCC, Hospital de la Santa Creu i Sant Pau, IIB-Sant Pau, c/ Sant Antoni M<sup>a</sup> Claret 167, 08025 Barcelona, Spain

<sup>2</sup>Cardiovascular Institute, Mount Sinai School of Medicine, New York, USA

<sup>3</sup>Department of Specialized, Diagnostic and Experimental Medicine, Bologna, Italy

<sup>4</sup>Cardiovascular Research Chair, UAB, Barcelona, Spain

## KEYWORDS

Cardiovascular disease;  
Risk factors;  
Prevention

Cardiovascular disease (CVD) is estimated to be the leading cause of death and disability-adjusted life years lost worldwide being coronary heart disease the most prevalent form of heart disease. The underlying cause of most CVD is atherosclerosis, a process mainly governed by lifestyle factors. Several epidemiological studies have enabled the recognition of the major risk factors for CVD development, ‘the so-called conventional risk factors’. Identification of such global risk factors have led, in turn, to the development of risk-prediction algorithms and cardiovascular risk models for men and women. Indeed, during the last years, there has been increasing credit of the importance of CVD in women accompanied by growing awareness of gender differences in natural history, preventive strategies, treatment, and prognosis of CVD. Classical risk factors, however, cannot fully explain the excess cardiovascular risk, and at least 25% of all future events occur in individuals with only one of the classical risk factors. This scenario has prompted the interest for discovering new risk factors. Time-trend analysis of surveys by the European Society of Cardiology (EUROASPIRE surveys) has reflected, however, that large proportions of European coronary patients are failing to achieve lifestyle, risk factor, and therapeutic targets for the prevention of CVD leaving room for improvement. Moreover, although overt CVD takes place during adulthood, lifestyle and dietary changes that have occurred over the last two decades support the need to instigate primary prevention measures during childhood as the best strategy to retard atherogenic processes.

Worldwide, cardiovascular disease (CVD) is estimated to be the leading cause of death and disability-adjusted life years (DALY) lost. According to the World Health Organization (WHO) global estimates of mortality and burden of disease, around 17.3 million people died from CVD in 2008 representing 30% of all global deaths.<sup>1,2</sup> Of these deaths, an estimated 7.3 million were due to coronary heart disease (CHD) and 6.2 million were due to stroke.<sup>2</sup> In fact, CHD is the second cause of death in people aged

under 59 years after HIV/AIDS, reaching the first position in those aged 60 years and above ([http://www.who.int/cardiovascular\\_diseases](http://www.who.int/cardiovascular_diseases)). Moreover, it is estimated that by 2030, more than 23.3 million people will die annually from CVDs.<sup>3</sup> Despite this epidemic has receded in many developed countries in the past decades, low- and middle-income countries have experienced an increase in the prevalence of CVD and 80% of the global burden of CVD occurs there. The higher exposition to cardiovascular risk factors, the lack of prevention programmes, and the fact that they have far less access to effective and equitable healthcare services (including early detection

\* Corresponding author. Tel: +34 935565880; Fax: +34 935565559;  
Email: lbadimon@csic-iccc.org

services) seem to have largely contributed to increase the prevalence of the disease.<sup>4</sup>

CVD also causes mass disability. DALY represents the 'healthy years of life lost' and combines years of potential life lost due to premature death with years of productive life lost due to disability, thereby, indicating the total burden of a disease as opposed to simply the resulting death. Within the coming decades, DALYs estimate for CVD is expected to rise from a loss of 85 million DALYs in 1990 to a loss of 150 million DALYs globally in 2020, thereby remaining the leading somatic cause of loss of productivity. As for CHD global burden, this is projected to rise from around 47 million DALYs globally in 1990 to 82 million DALYs in 2020. Currently, CHD disease burden occupies the third position in DALY lost in women (5.3%) after unipolar depressive disorders (8.4%) and HIV/AIDS (7.2%), whereas among men, it is found to be the second major cause of disease burden (6.8%) after HIV/AIDS (7.4%) ([http://www.who.int/cardiovascular\\_diseases](http://www.who.int/cardiovascular_diseases)).

The cause of most CVD is a build-up of atheroma inside the arteries, a process mainly governed by lifestyle factors.<sup>5</sup> Two major studies conducted during the second half of the 20th century, the *Framingham Heart Study*<sup>6</sup> and the *Seven Countries Study*,<sup>7</sup> made a significant contribution in identifying the major risk factors for CVD development, 'the so-called conventional risk factors' (*Table 1*). These classical risk factors met the following criteria: (i) presented a high prevalence in different populations, (ii) had a significant independent impact on the risk of CHD and stroke, and (iii) reduced cardiovascular risk with treatment and control. In this context, abnormal lipids, smoking, hypertension, diabetes, abdominal obesity, insufficient consumption of fruits and vegetables, excess consumption of alcohol, and lack of regular physical activity account for most of the modifiable risk factors of CHD worldwide.<sup>8</sup> Yet, contemporary women have shown increased burden of some of these risk factors as depicted in *Table 1*. Actually, the past decade has witnessed a long overdue recognition of the importance of CVD in women accompanied by an increasing awareness of gender differences in natural history, preventive strategies, treatment, and prognosis of CVD.<sup>9–11</sup> The identification of the global risk factors for CHD in the early large epidemiological studies led to the development of risk-prediction algorithms and cardiovascular risk models for men and women (Framingham, Reynolds, PROCAM, and SCORE) in order to estimate the risk profile for developing CHD and, hence, optimize and individualize preventive/treatment strategies.<sup>12</sup>

The large international INTERHEART study,<sup>8</sup> conducted from 1990 to 2010, concluded that conventional risk factors account for over 75% of CVD being dyslipidaemia and smoking the two most important risk factors for CHD around the globe, with abdominal obesity, diabetes, and hypertension following closely behind. However, the absence of cardiovascular risk factor exposure should not necessarily be viewed as a guarantee of a favourable prognostic sign.<sup>13</sup> In fact, classical risk factors cannot fully explain the excess cardiovascular risk and at least 25% of all future events occur in individuals with only one of the classical risk factors.<sup>14</sup> Moreover, the prevalence of traditional risk factors is almost as high in individuals without

the disease as in patients affected by it.<sup>15</sup> These observations have strengthened the need to discover new risk factors. In this regard, within the last years, diverse emerging risk factors have been directly associated with increased risk of CVD (*Table 1*).<sup>16</sup> These novel risk factors are measurable, improve cardiovascular risk prediction, and also assist clinicians in making decisions concerning patients at increased risk for specific diseases.<sup>17,18</sup> Among them, the highly sensitive C-reactive protein and genetic markers borne out of genome-wide linkage sibs-pair analyses for single nucleotide polymorphisms have emerged as potential candidates for CVD risk prediction.<sup>19,20</sup> However, causative, quantitative, and independent contributions of these new risk factors to CVD have not yet been fully elucidated. In fact, the ESC and AHA guidelines do not support routine genetic testing as part of the CVD risk-prediction process.

Despite the absence of reliable and effective risk predicting biomarkers, the WHO has always claimed that most CVD can be prevented by addressing classical risk factors. In this sense, in the mid-90s, Joint European Societies' gathered under the auspices of the ESC to rise clinical standards in secondary prevention against CHD based on European surveys (the EUROASPIRE surveys). EUROASPIRE I, II, and III (1997–2009)<sup>21–23</sup> demonstrated a high prevalence of unhealthy lifestyles, modifiable risk factors, and inadequate use of drug therapies to achieve CVD prevention in CHD patients and people at high risk of developing CVD in Europe. There also detected wide variations in medical practice between countries in the treatment of these patients. In fact, the EUROASPIRE III time trends survey showed a compelling need for more effective lifestyle management of patients with CHD and concluded that, despite a substantial increase in antihypertensive and lipid-lowering drugs, blood pressure management remained unchanged, and almost half of all patients remain above the recommended lipid targets. Moreover, the recently presented EUROASPIRE IV (ESC Congress 2013) further highlighted the pressing need for modern preventive cardiology programmes with lifestyle changes at their core. Moreover, although there is extensive evidence showing that drug treatment of conventional risk factors is effective in reducing cardiovascular events, the REACH registry<sup>24,25</sup>—aimed at examining the impact of adherence to guidelines for the control of atherothrombotic risk factors—demonstrated that there is an important underutilization of established medical therapy and lifestyle interventions. For instance, the use of guideline-recommended angiotensin-converting enzyme inhibitors is only 50%, about 80% of patients use antiplatelet therapy, and 70% are receiving statins.

Overall, these studies indicate that further efforts need to be implemented in European medical practice to optimally prevent and treat the risk of recurrence and death among patients with CHD. In 2012, the ESC published an updated guideline on CVD prevention in which the key message conveyed was 'prevention works'. '[Greater than] 50% of the reductions seen in CVD mortality relate to changes in risk factors and 40% to improved treatments'.<sup>26</sup> The guidelines also stressed that prevention should remain a lifelong effort to combat the progressive

**Table 1** Classical and emerging cardiovascular risk factors

|                             |                            |                                                                                                                                                                                                                                                                                                                                                                                         |
|-----------------------------|----------------------------|-----------------------------------------------------------------------------------------------------------------------------------------------------------------------------------------------------------------------------------------------------------------------------------------------------------------------------------------------------------------------------------------|
| Conventional risk factors   | Non-modifiable             | <ul style="list-style-type: none"> <li>Advancing age</li> <li>Heredity or family history</li> <li>Gender</li> <li>Ethnicity or race</li> </ul>                                                                                                                                                                                                                                          |
|                             | Modifiable                 | Major modifiable <ul style="list-style-type: none"> <li>High blood pressure</li> <li>Abnormal blood lipids</li> <li>Tobacco use (chewing or smoking)</li> <li>Physical inactivity</li> <li>Diabetes mellitus<sup>a</sup></li> <li>Nutrition</li> <li>Obesity<sup>a</sup></li> </ul>                                                                                                     |
|                             |                            | Other modifiable <ul style="list-style-type: none"> <li>Hormone replacement therapy (women only)<sup>a</sup></li> <li>Polycystic ovary syndrome (women only)<sup>a</sup></li> <li>Low socioeconomic status</li> <li>Depression<sup>a</sup></li> <li>Psychosocial stress</li> <li>Alcohol use</li> <li>Use of certain medication</li> <li>Left ventricular hypertrophy</li> </ul>        |
| Novel/emerging risk factors | Lipid-related factors      | <ul style="list-style-type: none"> <li>ApoB/ApoA1</li> <li>Small dense low-density lipoprotein (LDL)</li> <li>Lipoprotein(a)</li> <li>Remnant lipoproteins</li> <li>High-density lipoprotein subtypes</li> <li>Oxidized LDL</li> <li>Lipoprotein-associated phospholipase A(2)</li> <li>Myeloperoxidase</li> </ul>                                                                      |
|                             | Inflammation               | <ul style="list-style-type: none"> <li>High-sensitivity C-reactive protein</li> <li>Interleukins (e.g. IL-6)</li> <li>Serum amyloid A</li> <li>Vascular and cellular adhesion molecules</li> <li>Soluble CD40 ligand</li> <li>Leucocyte count</li> <li>F2-Isoprostanes</li> </ul>                                                                                                       |
|                             | Haemostasis and thrombosis | <ul style="list-style-type: none"> <li>Fibrinogen</li> <li>von Willebrand factor antigen</li> <li>Plasminogen activator inhibitor 1 (PAI-1)</li> <li>Tissue-plasminogen activator</li> <li>Factors V, VII, and VIII</li> <li>D-dimer</li> <li>Fibrinopeptide A</li> <li>Prothrombin fragment 1+2</li> <li>PAI-1 genotype</li> <li>Thrombin</li> <li>Platelet size and volume</li> </ul> |
|                             | Imaging markers            | <ul style="list-style-type: none"> <li>Coronary artery calcium score (CAC)</li> <li>Carotid intima-media thickness (CIMT)</li> </ul>                                                                                                                                                                                                                                                    |
|                             | Others                     | <ul style="list-style-type: none"> <li>Homocysteine</li> <li>Insulin resistance</li> <li>Ankel-brachial index</li> <li>Cardiac troponins</li> </ul>                                                                                                                                                                                                                                     |
|                             |                            | <ul style="list-style-type: none"> <li>B-type natriuretic peptide</li> <li>Microalbuminuria</li> <li>Oxidative stress</li> <li>Periodontal disease</li> <li>Genetic markers (SNPs)</li> </ul>                                                                                                                                                                                           |

<sup>a</sup>Risk factors that present a higher prevalence in women than men.

nature of atherosclerosis in both men and women. Although overt CVD typically occur in middle age or later, risk factors are determined to a great extent by behaviours learned in

childhood and youth and continued into adulthood, such as dietary habits and smoking. Throughout the world, cardiovascular risk factors are starting to appear earlier.

Moreover, physical activity has markedly decreased in adolescence; obesity rates have increased substantially, not only in Europe and North America, but also in Eastern traditionally slim populations (Chinese and Japanese); and, there has been a global spread of type 2 diabetes in children and adolescents.<sup>4</sup> Most importantly, markers of CVD can be seen in young children. Post-mortems of children who died in accidents have found fatty streaks and fibrous plaques in their coronary arteries and they were most frequently found in those children whose risk factors included smoking, elevated plasma lipids, high blood pressure, and obesity. These observations leave no doubt about when we need to start meaningful preventive measures. Instill healthy lifestyle habits early in life is certainly the best strategy to reduce the global burden of CVD.

## Acknowledgements

We thank Fundacion de Investigación Cardiovascular-Fundación Jesus Serra, Barcelona, for their continuous support.

## Funding

This work was supported by SAF 2010-16549 (to L.B.), SAF2012-40208 (to G.V.), and RD12/0019/0026-TerCel and RD12/0042/0027-Red de Investigación Cardiovascular from Institute Carlos III (to L.B.). G.V. is a recipient of a contract from the Innovation and Science Spanish Ministry (RyC-2009-5495, MICINN, Spain).

**Conflict of interest:** none declared.

## References

- Lozano R, Naghavi M, Foreman K, Lim S, Shibuya K, Aboyans V, Abraham J, Adair T, Aggarwal R, Ahn SY, Alvarado M, Anderson HR, Anderson LM, Andrews KG, Atkinson C, Baddour LM, Barker-Collo S, Bartels DH, Bell ML, Benjamin EJ, Bennett D, Bhalla K, Bikbov B, Bin Abdulhak A, Birbeck G, Blyth F, Bolliger I, Boufous S, Bucello C, Burch M, Burney P, Carapetis J, Chen H, Chou D, Chugh SS, Coffeng LE, Colan SD, Colquhoun S, Colson KE, Condon J, Connor MD, Cooper LT, Corriere M, Cortinovis M, de Vaccaro KC, Couser W, Cowie BC, Criqui MH, Cross M, Dabhadkar KC, Dahodwala N, De Leo D, Degenhardt L, Delossantos A, Denenberg J, Des Jarlais DC, Dharmaratne SD, Dorsey ER, Driscoll T, Duber H, Ebel B, Erwin PJ, Espindola P, Ezzati M, Feigin V, Flaxman AD, Forouzanfar MH, Fowkes FG, Franklin R, Fransen M, Freeman MK, Gabriel SE, Gakidou E, Gaspari F, Gillum RF, Gonzalez-Medina D, Halasa YA, Haring D, Harrison JE, Havmoeller R, Hay RJ, Hoen B, Hotez PJ, Hoy D, Jacobsen KH, James SL, Jasrasaria R, Jayaraman S, Johns N, Karthikeyan G, Kassebaum N, Keren A, Khoo JP, Knowlton LM, Kobusingye O, Koranteng A, Krishnamurthi R, Lipnick M, Lipshultz SE, Ohno SL, Mabweijano J, MacIntyre MF, Mallinger L, March L, Marks GB, Marks R, Matsumori A, Matzopoulos R, Mayosi BM, McAnulty JH, McDermott MM, McGrath J, Mensah GA, Merriman TR, Michaud C, Miller M, Miller TR, Mock C, Mocumbi AO, Mokdad AA, Moran A, Mulholland K, Nair MN, Naldi L, Narayan KM, Nasser K, Norman P, O'Donnell M, Omer SB, Ortblad K, Osborne R, Ozgediz D, Pahari B, Pandian JD, Rivero AP, Padilla RP, Perez-Ruiz F, Perico N, Phillips D, Pierce K, Pope CA 3rd, Porrini E, Pourmalek F, Raju M, Ranganathan D, Rehm JT, Rein DB, Remuzzi G, Rivara FP, Roberts T, De León FR, Rosenfeld LC, Rushton L, Sacco RL, Salomon JA, Sampson U, Sanman E, Schwebel DC, Segui-Gomez M, Shepard DS, Singh D, Singleton J, Sliwa K, Smith E, Steer A, Taylor JA, Thomas B, Tleyjeh IM, Towbin JA, Truelsen T, Undurraga EA, Venketasubramanian N, Vijayakumar L, Vos T, Wagner GR, Wang M, Wang W, Watt K, Weinstock MA, Weintraub R, Wilkinson JD, Woolf AD, Wulf S, Yeh PH, Yip P, Zabotian A, Zheng ZJ, Lopez AD, Murray CJ, AlMazroa MA, Memish ZA. Global and regional mortality from 235 causes of death for 20 age groups in 1990 and 2010: a systematic analysis for the global burden of disease study 2010. *Lancet* 2012;**380**:2095–2128.
- Global Status Report on Noncommunicable Diseases. Geneva: World Health Organization; 2010.
- Mathers CD, Loncar D. Projections of global mortality and burden of disease from 2002 to 2030. *PLoS Med* 2006;**3**:e442.
- WHO. Cardiovascular diseases. Updated March 2013: Fact sheet N° 317.
- Badimon L, Storey RF, Vilahur G. Update on lipids, inflammation and atherothrombosis. *Thromb Haemost* 2011;**105**(Suppl. 1):S34–S42.
- Dawber TR, Meadors GF, Moore FE Jr. Epidemiological approaches to heart disease: the Framingham study. *Am J Public Health Nations Health* 1951;**41**:279–281.
- Keys A, Menotti A, Karvonen MJ, Aravanis C, Blackburn H, Buzina R, Djordjevic BS, Dontas AS, Fidanza F, Keys MH, Kromhout D, Nedeljkovic S, Punsar S, Seccareccia F, Toshima H. The diet and 15-year death rate in the seven countries study. *Am J Epidemiol* 1986;**124**:903–915.
- Yusuf S, Hawken S, Ounpuu S, Dans T, Avezum A, Lanas F, McQueen M, Budaj A, Pais P, Varigos J, Lisheng L; INTERHEART Study Investigators. Effect of potentially modifiable risk factors associated with myocardial infarction in 52 countries (the interheart study): case-control study. *Lancet* 2004;**364**:937–952.
- Vaccarino V, Badimon L, Corti R, de Wit C, Dorobantu M, Manfrini O, Koller A, Pries A, Cenko E, Bugiardini R. Presentation, management, and outcomes of ischaemic heart disease in women. *Nat Rev Cardiol* 2013;**10**:508–518.
- Vaccarino V, Badimon L, Corti R, de Wit C, Dorobantu M, Hall A, Koller A, Marzilli M, Pries A, Bugiardini R; Working Group on Coronary Pathophysiology and Microcirculation. Ischaemic heart disease in women: are there sex differences in pathophysiology and risk factors? Position paper from the working group on coronary pathophysiology and microcirculation of the European Society of Cardiology. *Cardiovasc Res* 2011;**90**:9–17.
- Stranges S, Guallar E. Cardiovascular disease prevention in women: a rapidly evolving scenario. *Nutr Metab Cardiovasc Dis* 2012;**22**:1013–1018.
- Wilson PW, D'Agostino RB, Levy D, Belanger AM, Silbershatz H, Kannel WB. Prediction of coronary heart disease using risk factor categories. *Circulation* 1998;**97**:1837–1847.
- Canto JG, Kiefe CI, Rogers WJ, Peterson ED, Frederick PD, French WJ, Gibson CM, Pollack CV Jr, Ornato JP, Zalenski RJ, Penney J, Tiefenbrunn AJ, Greenland P; NIMI Investigators. Number of coronary heart disease risk factors and mortality in patients with first myocardial infarction. *JAMA* 2011;**306**:2120–2127.
- Khot UN, Khot MB, Bajzer CT, Sapp SK, Ohman EM, Brener SJ, Ellis SG, Lincoff AM, Topol EJ. Prevalence of conventional risk factors in patients with coronary heart disease. *JAMA* 2003;**290**:898–904.
- Greenland P, Knoll MD, Stamler J, Neaton JD, Dyer AR, Garside DB, Wilson PW. Major risk factors as antecedents of fatal and nonfatal coronary heart disease events. *JAMA* 2003;**290**:891–897.
- Brotman DJ, Walker E, Lauer MS, O'Brien RG. In search of fewer independent risk factors. *Arch Intern Med* 2005;**165**:138–145.
- Morrow DA, de Lemos JA. Benchmarks for the assessment of novel cardiovascular biomarkers. *Circulation* 2007;**115**:949–952.
- Hackam DG, Anand SS. Emerging risk factors for atherosclerotic vascular disease: a critical review of the evidence. *JAMA* 2003;**290**:932–940.
- Ridker PM, Danielson E, Fonseca FA, Genest J, Gotto AM Jr, Kastelein JJ, Koenig W, Libby P, Lorenzatti AJ, Macfadyen JG, Nordestgaard BG, Shepherd J, Willerson JT, Glynn RJ; JUPITER Trial Study Group. Reduction in C-reactive protein and LDL cholesterol and cardiovascular event rates after initiation of rosuvastatin: a prospective study of the JUPITER trial. *Lancet* 2009;**373**:1175–1182.
- Kibos A, Guerchicoff A. Susceptibility genes for coronary heart disease and myocardial infarction. *Acute Cardiac Care* 2011;**13**:136–142.
- Euroaspire. A European Society of Cardiology survey of secondary prevention of coronary heart disease: Principal results. Euroaspire Study Group. European Action on Secondary Prevention through Intervention to Reduce Events. *Eur Heart J* 1997;**18**:1569–1582.

22. Clinical reality of coronary prevention guidelines: a comparison of EUROASPIRE I and II in nine countries. EUROASPIRE I and II group. European Action on Secondary Prevention by Intervention to Reduce Events. *Lancet* 2001; **357**:995–1001.
23. Kotseva K, Wood D, De Backer G, De Bacquer D, Pyörälä K, Keil U; EUROASPIRE Study Group. EUROASPIRE III: a survey on the lifestyle, risk factors and use of cardioprotective drug therapies in coronary patients from 22 European countries. *Eur J Cardiovasc Prev Rehabil* 2009; **16**: 121–137.
24. Bhatt DL, Steg PG, Ohman EM, Hirsch AT, Ikeda Y, Mas JL, Goto S, Liao CS, Richard AJ, Röther J, Wilson PW; REACH Registry Investigators. International prevalence, recognition, and treatment of cardiovascular risk factors in outpatients with atherothrombosis. *JAMA* 2006; **295**:180–189.
25. Cacoub PP, Zeymer U, Limbourg T, Baumgartner I, Poldermans D, Röther J, Bhatt DL, Steg PG; REACH Registry Investigators. Effects of adherence to guidelines for the control of major cardiovascular risk factors on outcomes in the reduction of atherothrombosis for continued health (reach) registry Europe. *Heart* 2011; **97**:660–667.
26. Perk J, De Backer G, Gohlke H, Graham I, Reiner Z, Verschuren M, Albus C, Benlian P, Boysen G, Cifkova R, Deaton C, Ebrahim S, Fisher M, Germano G, Hobbs R, Hoes A, Karadeniz S, Mezzani A, Prescott E, Ryden L, Scherer M, Syväanne M, Scholte op Reimer WJ, Vrints C, Wood D, Zamorano JL, Zannad F; European Association for Cardiovascular Prevention & Rehabilitation (EACPR); ESC Committee for Practice Guidelines (CPG). European guidelines on cardiovascular disease prevention in clinical practice (version 2012). The fifth joint task force of the european society of cardiology and other societies on cardiovascular disease prevention in clinical practice (constituted by representatives of nine societies and by invited experts). *Eur Heart J* 2012; **33**:1635–1701.
